## CORRESPONDENCE

**Joel C. Morgenlander, M.D.**  
Assistant Professor of Medicine (Neurology)

Duke University Medical Center  
Box 3394  
Durham, North Carolina 27710

**Lloyd F. Redick, M.D.**  
Professor  
Department of Anesthesiology  
Associate Professor  
Department of Obstetrics and Gynecology

**Reference**

1. Page LK: Occult spinal dysraphism and related disorders, Neurosurgery. Edited by Wilkins RH, Rengachary SS. New York, McGraw-Hill, 1985, pp 2053-2058

(Accepted for publication May 25, 1994.)

Anesthesiology  
81:785, 1994  
© 1994 American Society of Anesthesiologists, Inc.  
J. B. Lippincott Company, Philadelphia

## Stellate Ganglion Block: What's Old, What's New?

*To the Editor:*—I read with interest Elias and Chakerian's recent report<sup>1</sup> in which they describe the use of a catheter technique for stellate ganglion block in a pediatric patient. The authors are to be commended for thus sparing the child the trauma and discomfort of repeated stellate blocks by separate injection.

However, although the authors state, ". . . to our knowledge, this is the first report of placement of a catheter to perform a series of stellate ganglion blocks, thereby avoiding repeated needle placements . . .," I published the first case report of a continuous catheter stellate ganglion block in this journal<sup>2</sup> in 1967! Although my patient was an adult, the concept and goals were similar.

What may have been considered an innovative approach by the authors is a technique that, in fact, is almost 30 yr old.

**Robert P. Geraci, M.D.**  
Clinical Associate Professor

University of Rochester School of Medicine and  
Dentistry and Strong Memorial Hospital  
601 Elmwood Avenue  
Rochester, New York 14642

**References**

1. Elias M, Chakerian M: Repeated stellate ganglion blockade using a catheter for pediatric herpes zoster ophthalmicus. ANESTHESIOLOGY 80:950-952, 1994
2. Geraci R: Continuous stellate ganglion block. ANESTHESIOLOGY 28:632, 1967

(Accepted for publication May 27, 1994.)

Anesthesiology  
81:785, 1994  
© 1994 American Society of Anesthesiologists, Inc.  
J. B. Lippincott Company, Philadelphia

*In Reply:*—Geraci's comments regarding our case report<sup>1</sup> are appreciated. The authors apologize for overlooking his report of the first use of the stellate ganglion catheter technique.<sup>2</sup>

We agree that this technique is not new. However, we believe that Geraci missed the point of our report, which was management of pain in a pediatric patient. Children's pain management presents special difficulties, especially when invasive procedures are involved. This also is an age group whose pain is often undertreated. The authors hope to increase awareness of these issues and offer an alternative treatment. The end of the sentence Geraci quoted is, ". . . and general anesthetic administration in a pediatric patient."

**Mala U. Chakerian, M.D.**  
15891 Los Gatos Almaden Road  
Los Gatos, California 95032

**References**

1. Elias M, Chakerian M: Repeated stellate ganglion blockage using a catheter for pediatric herpes zoster ophthalmicus. ANESTHESIOLOGY 80:950-952, 1994
2. Geraci R: Continuous stellate ganglion block. ANESTHESIOLOGY 28:632, 1967

(Accepted for publication May 27, 1994.)
